# Supplementary material for: Psychotherapieausbildung in Österreich
Source: Springer Nature journal article supplement (doi:10.1007/s00739-018-0508-9), 2018-09-10
Supplement: MOESM1 [file 16112536]

Literatur

1. BMASGK, *Anerkannte Psychotherapiemethoden in Österreich: Patientinnen/Patienten-Information über die in Österreich anerkannten psychotherapeutischen Methoden Stand 2014.* https://[www.bmgf.gv.at/home/Gesundheit/Psychische_Gesundheit/In_Oesterreich_anerkannte_Psychotherapiemethoden](http://www.bmgf.gv.at/home/Gesundheit/Psychische_Gesundheit/In_Oesterreich_anerkannte_Psychotherapiemethoden) 2014.

2. Bundesministerium für Wissenschaft und Forschung, Wien. *Psychotherapiegesetz BGBl. Nr. 361 ST0151* 1990.

3. Springer-Kremser, M., et al., *Can legislation provide a better match between demand and supply in psychotherapy?* Soc Psychiatry Psychiatr Epidemiol, 2002. 37(10): p. 492-500.

4. American Psychological Association, *Evidence-based practice in psychology.* American Psychologist, 2006. 61(4): p. 271-285.

5. Campbell, L.F., Norcross, J. C., Vasquez, M. J. T., & Kaslow, N. J., *Recognition of psychotherapy effectiveness: The APA resolution.* Psychotherapy, 2013. 50(1): p. 98-101.

6. Elkins, D.N., *Toward a common focus in psychotherapy research.* Psychotherapy in Australia, 2012. 49(4): p. 450-454.

7. Lingiardi, V., Holmqvist, R., & Safran, J., *Relational turn and psychotherapy research.* Contemporary Psychoanalysis, 2016: p. 1-38.

8. Tryon, W.W., *Introduction. In Cognitive Neuroscience and Psychotherapy. Network Principles for a Unified Theory* New York: Academic Press, 2014: p. 5-66.

9. Beutler, L.E., Malik, M., Alimohamend, S., Harwood, T. M., Talebi, H., Noble, S., Wong, E., *Therapist Variables.*, in *Bergin and Garfield's handbook of psychotherapy and behavior change (Vol. 5).* M.J.L. (Ed.). Editor. 2004, Wiley: New York.

10. Orlinsky, D.E., & Rønnestad, M. H., *How Psychotherapists Develop.* Washington, DC: American Psychological Association. 2005.

11. Norcross, J.C., *Psychotherapy relationships that work: Therapist contributions and responsiveness to patients.* New York: Oxford University Press. 2002.

12. Orlinsky, D.E., Strauss, B., Ronnestad, M. H., Hill, C., Castonguay, L., Willutzki, U., Carlsson, J., *Education and Training. A collaborative study of development in psychotherapy trainees.* Psychotherapy Bulletin, 2015. 50(4): p. 21-25.

13. Duncan, B., *On becomig a better therapist.* Psychotherapy in Australia, 2010. 16(4): p. 42-51.

14. Kohl, S., Barnow, S., Brähler, E., Fegert, J. M., Fliegel, S., Freyberger, H. J., Strauß, B., *Die Psychotherapieausbildung aus Sicht der Lehrkräfte.* Psychotherapeut, 2009. 54(6): p. 445-456.

15. Lorentzen, S., Rønnestad, M. H., & Orlinsky, D., *Sources of influence on the professional development of psychologists and psychiatrists in Norway and Germany.* European Journal of Psychotherapy & Counselling, 2011. 13(2): p. 141-152.

16. Strauß, B., & Kohl, S., *Themen der Ausbildungsforschung in der Psychotherapie.* Psychotherapeut,, 2009. 54(6): p. 411-426.

17. Sudak, D.M., & Goldberg, D. A. (2012), *Trends in psychotherapy training: A national survey of psychiatry residency training.* Academic Psychiatry, 2012. 36(5): p. 369-373.

18. Hill, C.E., & Knox, S., *Training and supervision in psychotherapy.* In M. Lambert (Ed.), Bergin and Garfield’s handbook of psychotherapy and behavior change., 2013: p. 775-812.

19. Taubner, S., Klasen, J., Hanke, W., & Möller, H., *Ein empirischer Zugang zur Erfassung der Kompetenzentwicklung von PsychotherapeutInnen in Ausbildung.* Psychotherapie Forum, 2015. 20: p. 47-53.

20. Joutsenniemi, K., Laaksonen, M. A., Knekt, P., Haaramo, P., & Lindfors, O., *Prediction of the outcome of short- and long-term psychotherapy based on socio-demographic factors.* Journal of Affective Disorders, 2012. 141(2-3): p. 331-342.

21. Pastner, B., et al., *Development of Therapeutic Attitudes: Teaching and Learning in Psychotherapy.* Procedia ‒ Social and Behavioral Sciences, 2014. 116: p. 1170-1175.

22. Sharpless, B.A., Barber, Jacques P., *Predictors of program performance on the Examination for Professional Practice in Psychology (EPPP).* Professional Psychology: Research and Practice 2013. 44(4): p. 208-217.

23. Löffler-Stastka, H., et al., *„Basiscurriculum in psychotherapeutischer Medizin“: Psychotherapeutische Ausbildung in der Psychiatrie – ein Beginn.* Psychiatrie und Psychotherapie, 2011. 7(1): p. 20.

24. Nissen-Lie, H.A., Havik, O. E., Høglend, P. A., Monsen, J. T., & Rønnestad, M. H. , *The contribution of the quality of therapists’ personal lives to the development of the working alliance.* Journal of Counseling Psychology, 2013. **60**(4): p. 483-495.

25. Pleschberger, I., Löffler-Stastka, H., *Mentalizing in psychotherapy training. An exploratory study on change in mentalizing skills as an effect of psychotherapy training. .* Conference of the Society for Psychotherapy Research, UK & European Chapters, 4th joint conference on "Psychotherapy practice and research: Finding the common ground"., 2017.

26. Pleschberger, I., *Mentalizing in psychotherapy training: An exploratory study on change in mentalizing skills as an effect of psychotherapy training,* Medizinische Universität Wien, 2017.
